# Supplementary material
Source: HighWire-hosted journal article supplement (https://rapm.bmj.com/highwire/filestream/24339/field_highwire_adjunct_files/3/rapm-2023-105024supp004_data_supplement.pdf)
Supplement: rapm-2023-105024supp004_data_supplement.pdf [file rapm-2023-105024supp004_data_supplement.pdf]

**SUPPLEMENTARY TABLE 4.** SUMMARY OF KEY RESULTS FROM STUDIES EVALUATING SYSTEMIC ANALGESICS, SYSTEMIC ANALGESIC ADJUNCTS AND REGIONAL ANALGESIA THAT ARE NOT RECOMMENDED INTERVENTIONS IN PATIENTS UNDERGOING CLEFT PALATE SURGERY

| Study                                                         | Study design                                                                           | Pain scores                                                | Total opioid consumption                                   | Basic analgesia and baseline analgesia                                                         |
|---------------------------------------------------------------|----------------------------------------------------------------------------------------|------------------------------------------------------------|------------------------------------------------------------|------------------------------------------------------------------------------------------------|
| Sphenopalatine ganglion block                                 |                                                                                        |                                                            |                                                            |                                                                                                |
| Parameswaran et al. 2018 [16]                                 | Sphenopalatine ganglion block (n=51) vs control (n=46)                                 | No significant difference between groups                   | N/A                                                        | No basic analgesia; baseline analgesia: local anaesthesia infiltration                         |
| Clonidine as adjuvant to suprazygomatic maxillary nerve block |                                                                                        |                                                            |                                                            |                                                                                                |
| Barbero et al. 2021 [25]                                      | Clonidine + bupivacaine + epinephrine (n=29) vs bupivacaine + epinephrine (n=25)       | No significant difference between groups                   | Favours clonidine + bupivacaine vs bupivacaine group       | Basic analgesia: PO acetaminophen and ibuprofen; no other baseline analgesia                   |
| Dexmedetomidine as adjuvant for palatine nerve block          |                                                                                        |                                                            |                                                            |                                                                                                |
| Obayah et al. 2010 [24]                                       | Dexmedetomidine + bupivacaine (n=15) vs bupivacaine (n=15)                             | Favours dexmedetomidine + bupivacaine vs bupivacaine group | Favours dexmedetomidine + bupivacaine vs bupivacaine group | No basic analgesia; baseline analgesia: dexamethasone peroperatively                           |
| Specific local anaesthetics (for nerve block)                 |                                                                                        |                                                            |                                                            |                                                                                                |
| Jindal et al. 2022 [27]                                       | Infraorbital block with levo-bupivacaine 0.375% (n=40) vs ropivacaine 0.375% (n=40)    | Favours levobupivacaine vs ropivacaine group               | Favours levobupivacaine vs ropivacaine group               | Basic analgesia: only one does of IV diclofenac at end of surgery; no other baseline analgesia |
| Mostafa et al. 2018 [26]                                      | Suprazygomatic maxillary nerve block with levobupivacaine (n=30) vs bupivacaine (n=30) | No significant difference between groups                   | No significant difference between groups                   | No basic or baseline analgesia                                                                 |
| Specific local anaesthetics (for infiltration)                |                                                                                        |                                                            |                                                            |                                                                                                |

|                                                     |                                                                             |                                                                                                                     |                                          |                                                                     |
|-----------------------------------------------------|-----------------------------------------------------------------------------|---------------------------------------------------------------------------------------------------------------------|------------------------------------------|---------------------------------------------------------------------|
| Jha et al. 2013 [29]                                | Bupivacaine (n=25) vs ketamine (n=25)                                       | Favours ketamine vs bupivacaine group at a single time point (24h)                                                  | No significant difference between groups | No basic or baseline analgesia                                      |
| Ketamine local infiltration                         |                                                                             |                                                                                                                     |                                          |                                                                     |
| Jha et al. 2013 [29]                                | Bupivacaine (n=25) vs ketamine (n=25)                                       | Favours ketamine vs bupivacaine group at a single time point (24h)                                                  | No significant difference between groups | No basic or baseline analgesia                                      |
| Pre-incisional infiltration with local anaesthetics |                                                                             |                                                                                                                     |                                          |                                                                     |
| Coban et al. 2008 [28]                              | Ropivacaine infiltration (10) vs control (10)                               | Favours ropivacaine vs control group                                                                                | N/A                                      | No basic or baseline analgesia                                      |
| IV Lidocaine                                        |                                                                             |                                                                                                                     |                                          |                                                                     |
| Kheirabadi et al. 2020 [34]                         | IV lidocaine (n=28) vs dexamethasone (n=30) vs distilled water (n=29)       | Favours lidocaine vs distilled water group; no significant difference between dexamethasone and lidocaine group     | N/A                                      | No basic or baseline analgesia                                      |
| IV Propofol                                         |                                                                             |                                                                                                                     |                                          |                                                                     |
| Huang et al. 2022 [31]                              | IV infusion with propofol (n=29) vs dexmedetomidine (n=29) vs saline (n=28) | Favours propofol vs control group; favours dexmedetomidine vs propofol group                                        | N/A                                      | No basic analgesia; baseline analgesia: IV infusion with sufentanil |
| Intravenous dexamethasone                           |                                                                             |                                                                                                                     |                                          |                                                                     |
| Kheirabadi et al. 2020 [34]                         | IV dexamethasone (n=30) vs lidocaine (n=28) vs distilled water (n=29)       | Favours dexamethasone vs distilled water group; no significant difference between dexamethasone and lidocaine group | N/A                                      | No basic or baseline analgesia                                      |

Abbreviations: IV (intravenous); N/A (not applicable); NRS (numeric rating score); PO (per os); post op (postoperatively); VAS (visual analogue scale)
